# Supplementary material for: Random non-fasting C-peptide testing can identify patients with insulin-treated type 2 diabetes at high risk of hypoglycaemia
Source: Springer Nature journal article supplement (doi:10.1007/s00125-017-4449-2), 2017-10-05
Supplement: MOESM1 [file 15111258]

**Electronic Supplementary Material for “Random non-fasting C-peptide testing can identify patients with insulin-treated type 2 diabetes at high risk of hypoglycaemia”**

|                                         | C-peptide<br><200pmol/L | C-peptide<br>≥600pmol/L | p       |
|-----------------------------------------|-------------------------|-------------------------|---------|
| Glucose SD (mmol/L)                     | 4.1 (3.7, 4.5)          | 3.1(2.7, 3.4)           | <0.001  |
| MAGE                                    | 7.2 (6.0, 8.4)          | 5.9 (4.6, 7.1)          | 0.1     |
| Duration ≤4.0 mmol/L (minutes per week) | 631 (405, 855)          | 222 (0, 448)            | 0.02    |
| Duration ≤3.0 mmol/L (minutes per week) | 184 (66, 302)           | 46 (0, 164)             | 0.13    |
| Duration ≤2.2 mmol/L (minutes per week) | 37 (2, 71)              | 5 (0, 40)               | 0.2     |
| LBGI                                    | 5.5 (3.8, 7.3)          | 1.9 (0.8, 3.0)          | < 0.001 |

**ESM Table 1: CGM mean (95% CI) glucose variability (SD, MAGE), hypoglycaemia duration and Low Blood Glucose Index (LBGI) in those with C-peptide <200pmol/L and >600pmol/L, adjusted for Mean glucose and use of prandial insulin (ANCOVA). N=34**

| Characteristic                       | Rate ratio<br>(95% CI) | p      | Adjusted rate<br>ratio (95% CI) | p      |
|--------------------------------------|------------------------|--------|---------------------------------|--------|
| Rate ≤4.0 mmol/L (episodes per week) | 2.7 (1.8, 3.9)         | <0.001 | 3.5 (2.0, 6.2)                  | <0.001 |
| Rate ≤3.0 mmol/L (episodes per week) | 5.5 (2.3, 13.6)        | <0.001 | 3.0 (1.2, 7.4)                  | 0.015  |
| Rate ≤2.2 mmol/L (episodes per week) | 6.0 (0.7, 49.8)        | 0.10   | 3.5 (0.4, 29.5)                 | 0.2    |

**ESM Table 2: Rate ratios for CGM-detected hypoglycaemia in those with C-peptide <200pmol/L (versus >600pmol/L), unadjusted and adjusted for HbA1c and prandial insulin (Poisson regression). N=34**

|                                      | C-peptide<br><200pmol/L | C-peptide<br>≥200pmol/L | p       |
|--------------------------------------|-------------------------|-------------------------|---------|
| N                                    | 179 (86%)               | 30 (14%)                |         |
| Age (years)                          | 50.1 (48.5, 52.8)       | 55.1 (49.4, 60.8)       | 0.1     |
| Age of Diagnosis (years)             | 25.4 (23.1, 27.8)       | 44.7 (38.7, 50.6)       | <0.0001 |
| Duration diabetes (years)            | 25.4 (23.0, 27.5)       | 10.4 (6.7, 14.1)        | <0.0001 |
| BMI (kg/m)                           | 26.7 (26.0, 27.4)       | 27.2 (25.1, 29.3)       | 0.6     |
| % Male                               | 46                      | 40                      | 0.7     |
| HbA1c (mmol/mol)                     | 66.8 (64.8, 68.9)       | 63.4 (55.0, 71.8)       | 0.2     |
| HbA1c (%)                            | 8.3 (8.1,8.5)           | 8.0 (7.2, 8.7)          | 0.2     |
| Time to insulin (months)             | 0.6 (0.4, 0.8)          | 1.5 (0.2, 2.8)          | <0.001  |
| Insulin dose (u/KG)                  | 0.62 (0.57, 0.67)       | 0.60 (0.40, 0.80)       | 0.7     |
| Use of prandial or mixed insulin (%) | 98 (94, 100)            | 72 (51, 88)             | <0.0001 |

**ESM Table 3: Characteristics of participants with a clinical diagnosis of Type 1 diabetes in the hypoglycaemia questionnaire cohort, by C-peptide status. Mean (95% confidence interval)**

| Characteristic                                                                     | Odds ratio or rate ratio (95% CI) | p      | Adjusted odds or rate ratio (95% CI) | p      |
|------------------------------------------------------------------------------------|-----------------------------------|--------|--------------------------------------|--------|
| Q3: 1 or more hypoglycaemic episodes needing external help in the last 6 months    | 1.3 (0.6, 2.7)                    | 0.5    | 1.5 (0.6, 3.8)                       | 0.4    |
| Q4: 1 or more severe hypoglycaemia episodes (unconscious/seizure) in the last year | 5.0 (2.0, 12.7)                   | 0.001  | 9.5 (2.6, 33.8)                      | <0.001 |
| Q5: 1 or more hypoglycaemia episodes in the last month with symptoms               | 2.1 (1.0, 4.6)                    | 0.06   | 1.9 (0.7, 5.1)                       | 0.2    |
| Q5 hypoglycaemia rate: episodes with symptoms, per person per month                | 2.0 (1.6, 2.4)                    | <0.001 | 1.6 (1.2, 2.1)                       | <0.001 |
| Q6: 1 or more hypoglycaemia episodes in the last month without symptoms            | 2.1 (0.90, 5.0)                   | 0.09   | 2.1 (0.7, 6.5)                       | 0.2    |
| Q6 Rate: hypoglycaemia rate: episodes without symptoms, per person per month       | 2.0 (1.4, 2.8)                    | <0.001 | 4.1 (2.7, 6.1)                       | <0.001 |
| Hypoglycaemia unaware (Clarke score $\geq 4$ )                                     | 2.5 (0.74, 8.2)                   | 0.17   | 12.1                                 | 0.005  |

**ESM Table 4a: Type 2 diabetes - odds ratios and rate ratios for those with C-peptide <200pmol/L versus  $\geq 200$ pmol/L for self-reported hypoglycaemia in the Clarke Questionnaire (Questions 3 to 6), unadjusted and adjusted for age, gender, HbA1c and prandial insulin.**

| Characteristic                                                                    | Odds ratio or IRR<br>95% CI | p      | Adjusted odds ratio/IRR | p      |
|-----------------------------------------------------------------------------------|-----------------------------|--------|-------------------------|--------|
| Q3: 1 or more episodes needing external help in the last 6 months                 | 1.2 (0.53, 2.8)             | 0.6    | 1.2 (0.4,3.3)           | 0.7    |
| Q4 1 or more severe hypoglycaemia episodes (unconscious/seizure) in the last year | 1.2 (0.3, 4.3)              | 0.8    | 3.2 (0.5, 19.7)         | 0.2    |
| Q5: 1 or more hypoglycaemia episodes in the last month with symptoms              | 6.8 (2.6, 17.6)             | <0.001 | 7.1 (2.3, 22.1)         | 0.001  |
| Q5 hypoglycaemia rate: episodes with symptoms, per person per month               | 2.1 (1.7, 2.6)              | <0.001 | 2.0 (1.6, 2.6)          | <0.001 |
| Q6: 1 or more hypoglycaemia episodes in the last month without symptoms           | 2.6 (0.94, 7.1)             | 0.07   | 2.1 (0.68, 6.5)         | 0.2    |
| Q6 Rate: hypoglycaemia rate: episodes without symptoms, per person per month      | 2.7 (1.7, 4.4)              | <0.001 | 2.0 (1.2, 3.2)          | 0.008  |
| Hypoglycaemia unaware (Clarke score >=4)                                          | 3.9 (0.50, 29.8)            | 0.12   | 4.3 (0.55, 33.5)        | 0.17   |

**ESM Table 4b: Type 1 diabetes - odds ratios and rate ratios for those with C-peptide <200pmol/L versus ≥200pmol/L for self-reported hypoglycaemia in the Clarke Questionnaire (Questions 3 to 6), unadjusted and adjusted for age, gender, HbA1c and prandial insulin.**

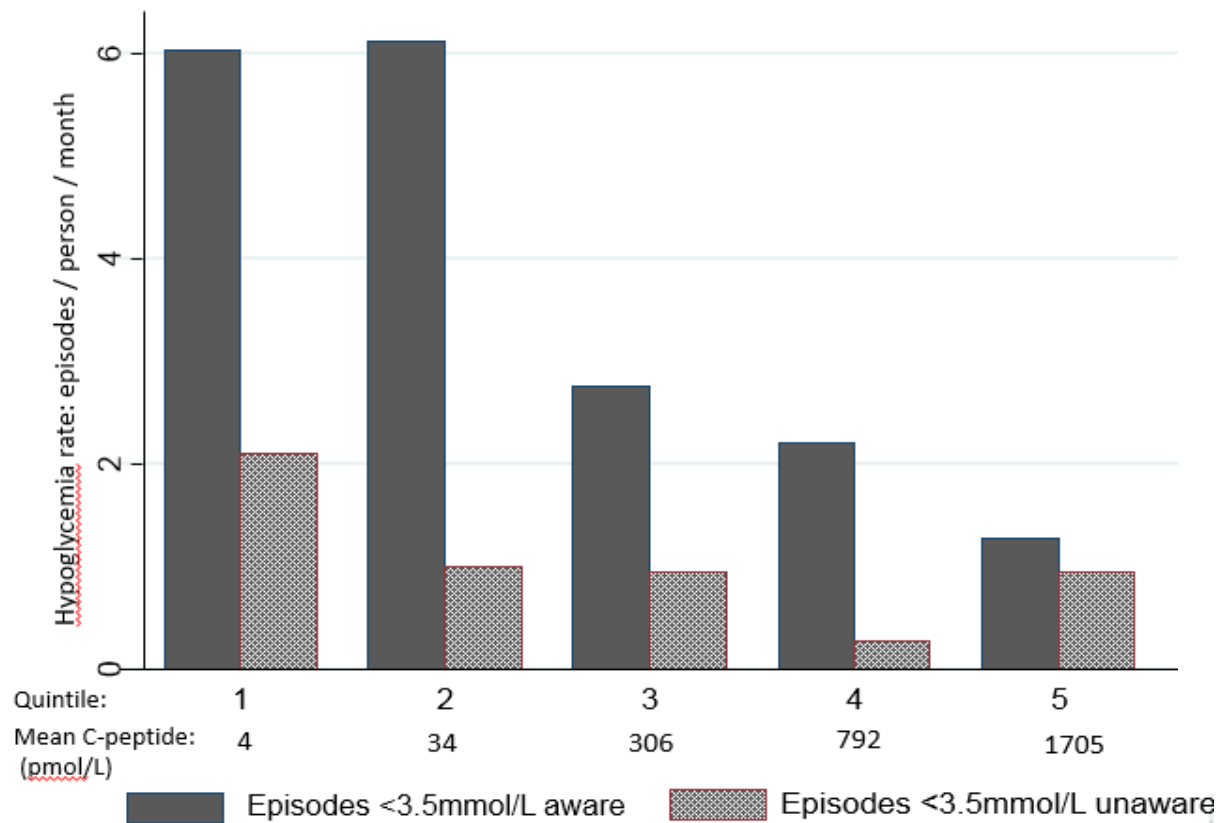

**ESM Fig. 1: Rate of hypoglycaemia (self-reported episodes blood glucose <3.5mmol/mol) in the last month (Clarke’s Hypoglycaemia Q5 & 6) shown by quintiles of C-peptide. Whole cohort (n=465). Mean C-peptide per quintile shown below.**
